# Supplementary material for: Increased Adult Aedes aegypti and Culex quinquefasciatus (Diptera: Culicidae) Abundance in a Dengue Transmission Hotspot, Compared to a Coldspot, within Kaohsiung City, Taiwan
Source: MDPI journal article supplement (doi:10.3390/insects9030098), 2018-08-13
Supplement: s1 [file s1]

## Appendix S1

Results of the Welch's t test comparing the mean number of *Culex quinquefasciatus* and *Aedes aegypti* from biweeks 1 to 11 with and without the broken traps.

*Cx. quinquefasciatus* from Sanmin

Welch's t = -0.76472, df = 19.401, p-value = 0.4536

*Cx. quinquefasciatus* from Nanzih

Welch's t = 0.19923, df = 19.638, p-value = 0.8441

*Ae. aegypti* from Sanmin

Welch's t = -0.10598, df = 19.473, p-value = 0.9167

*Ae. aegypti* from Nanzih

Welch's t = 0.44631, df = 19.58, p-value = 0.6603
