# Supplementary material for: Increased Adult Aedes aegypti and Culex quinquefasciatus (Diptera: Culicidae) Abundance in a Dengue Transmission Hotspot, Compared to a Coldspot, within Kaohsiung City, Taiwan
Source: MDPI journal article supplement (doi:10.3390/insects9030098), 2018-08-13
Supplement: s1 [file s1]

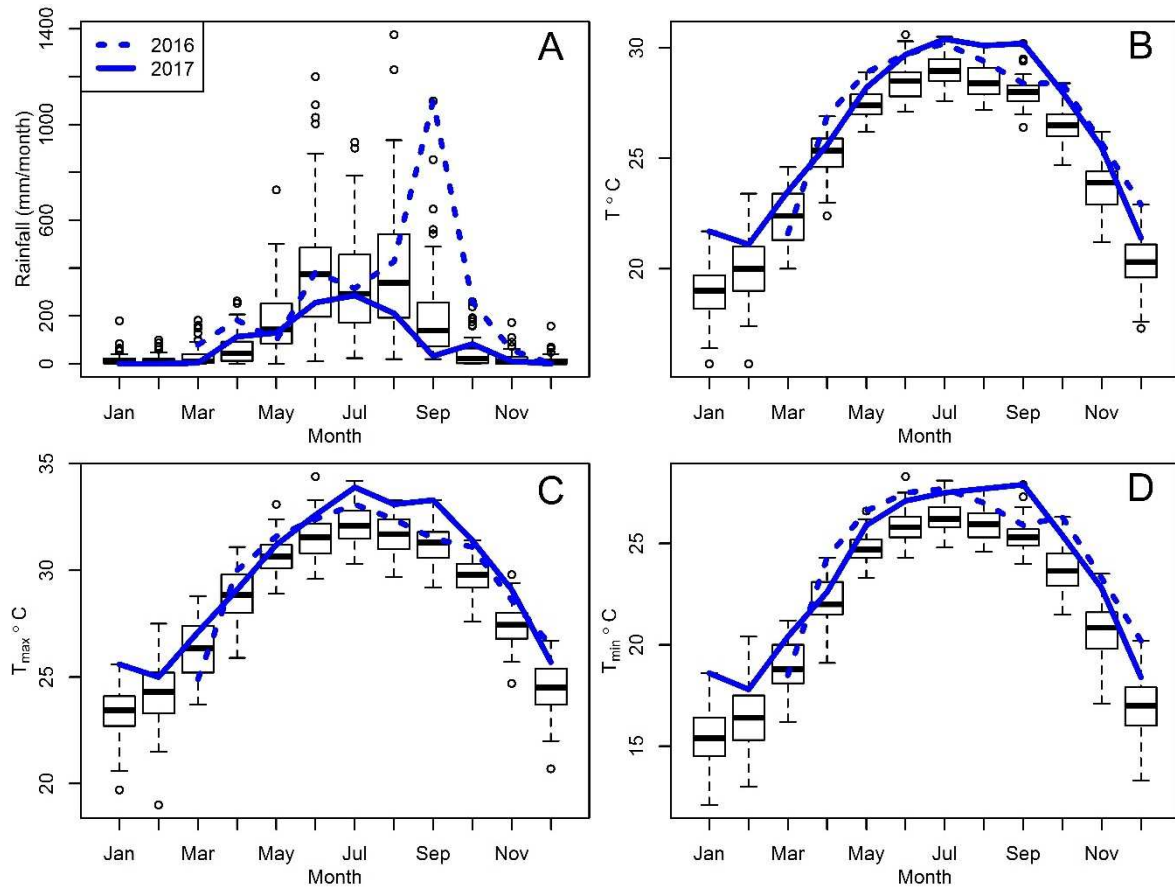

**Figure S2. Seasonal boxplots of climatic variables at Kaohsiung City, Taiwan.** (A) Rainfall (B) Mean Temperature (C) Maximum Temperature (D) Minimum Temperature. Boxplots were made with monthly records, from January 1960 to December 2017, collected by the Kaohsiung weather service office; ID:46744 (120.30 °E, 22.57 °N). The blue lines show the monthly estimates for the period from March 2016 to December 2017, for further details please refer to the inset legend in panel (A).
